# Supplementary material for: Integrated Human and Murine Clinical Study Establishes Clinical Efficacy of Ruxolitinib in Chronic Myelomonocytic Leukemia
Source: Oxford University Press journal article supplement (doi:10.1158/1078-0432.ccr-21-0935), 2021-07-12
Supplement: 10780432ccr210935-sup-262276_2_supp_7174754_qfdxr3.docx [file 10780432ccr210935-sup-262276_2_supp_7174754_qfdxr3.docx]

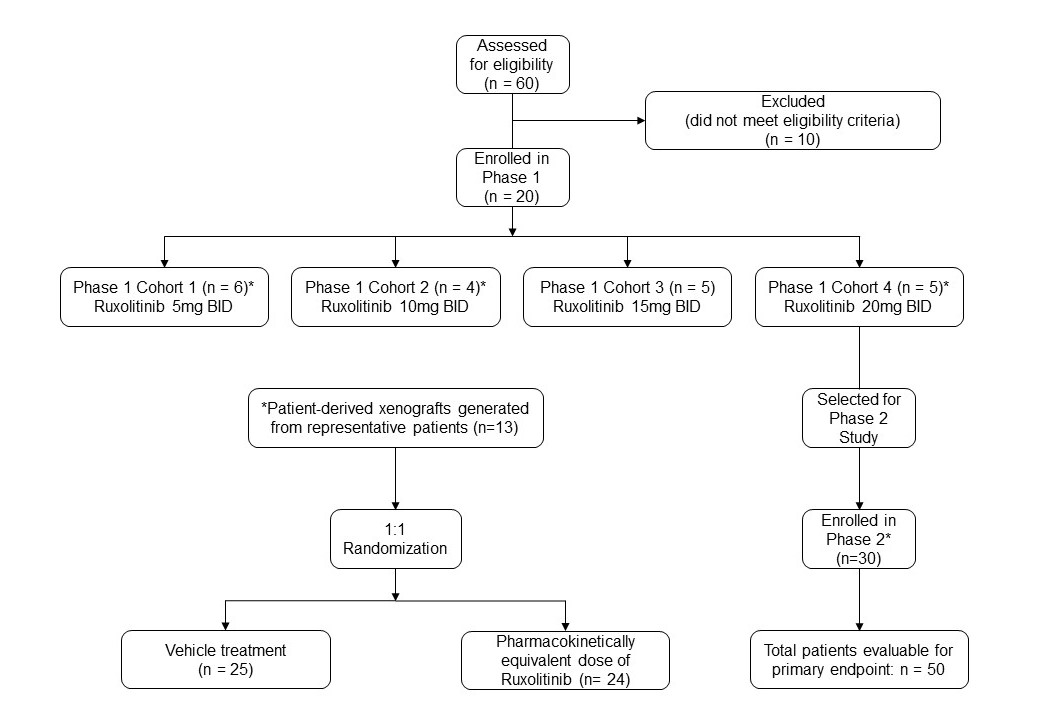


**Supplementary Figure S1. Study design.** The phase 1 portion of the study followed a dose escalation, rolling six design. Based on dose-limiting toxicities, ruxolitinib 20mg taken twice daily was selected as the phase 2 dose. *Patient-derived xenograft models were generated from 13 representative patients treated in both phase 1 and phase 2, with 49 xenograft mice successfully created and included in final analyses.
