# Supplementary material for: Integrated Human and Murine Clinical Study Establishes Clinical Efficacy of Ruxolitinib in Chronic Myelomonocytic Leukemia
Source: Oxford University Press journal article supplement (doi:10.1158/1078-0432.ccr-21-0935), 2021-07-12
Supplement: 10780432ccr210935-sup-262276_2_supp_7174759_qcdxr3.docx [file 10780432ccr210935-sup-262276_2_supp_7174759_qcdxr3.docx]

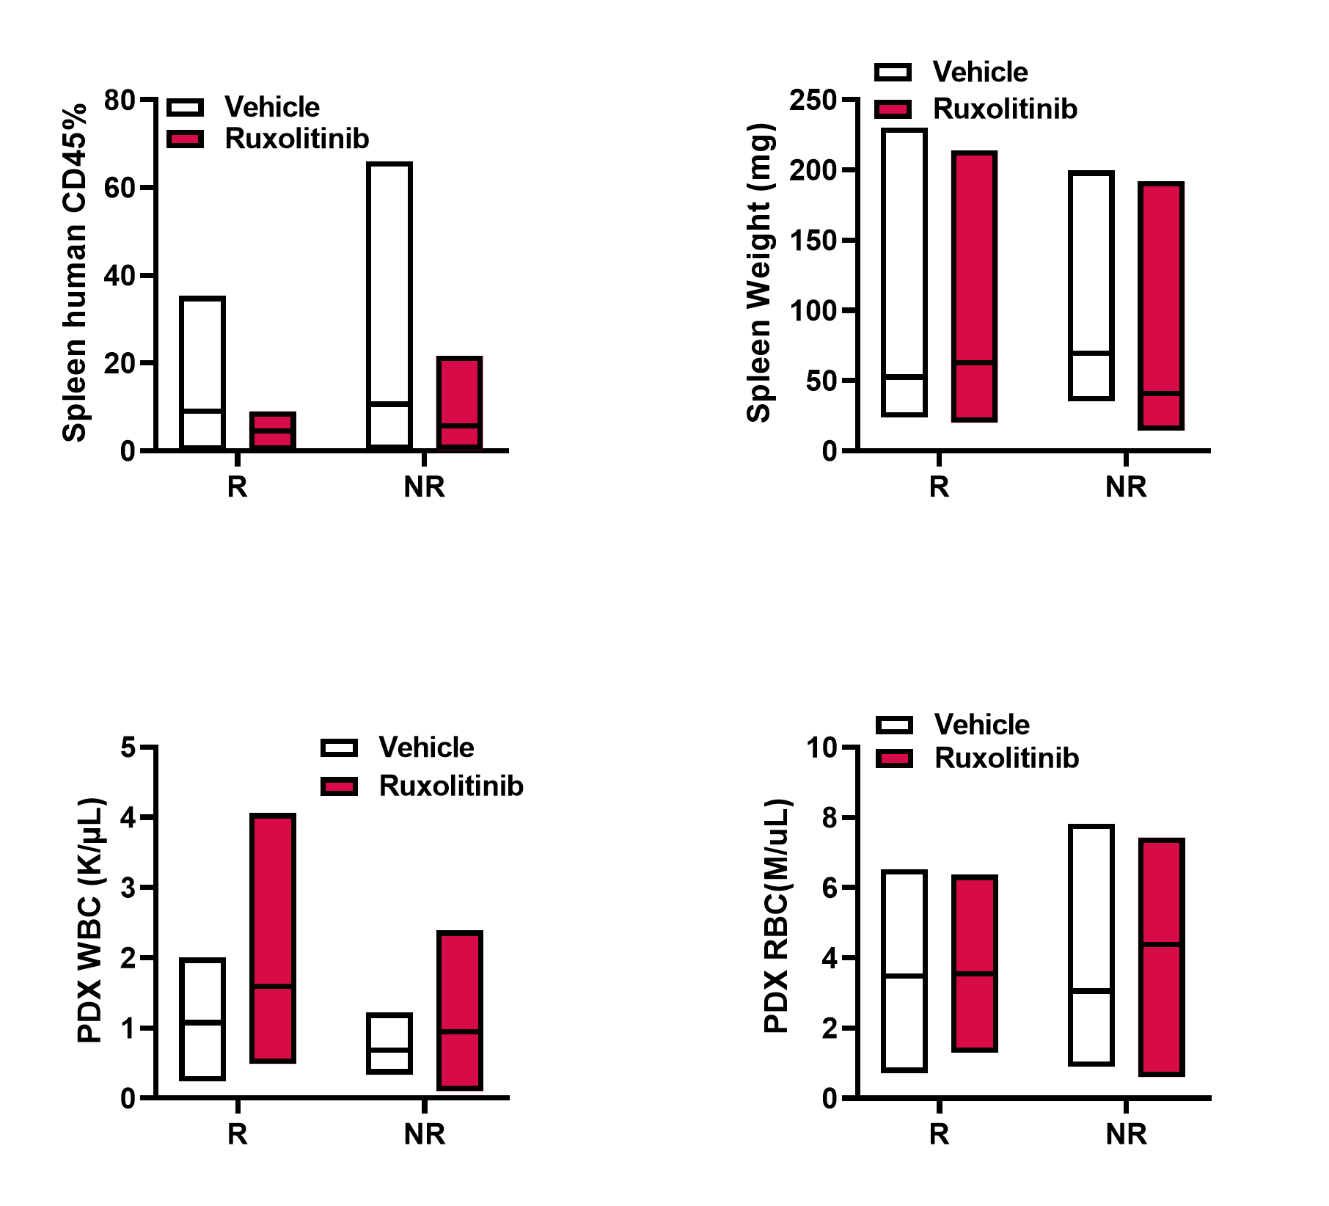


**Supplementary Figure S6. Additional metrics assessed at necropsy.** Comparison of spleen weights, spleen human CD45% engraftment and peripheral blood counts in vehicle (white) and ruxolitinib-treated (pink) mice. Results are stratified by clinical response observed in the corresponding patient from which they were derived (R = response, NR = no response). No comparisons exhibited statistical significance.
