# Supplementary material for: Integrated Human and Murine Clinical Study Establishes Clinical Efficacy of Ruxolitinib in Chronic Myelomonocytic Leukemia
Source: Oxford University Press journal article supplement (doi:10.1158/1078-0432.ccr-21-0935), 2021-07-12
Supplement: 10780432ccr210935-sup-262276_2_supp_7174760_q7dxr3.docx [file 10780432ccr210935-sup-262276_2_supp_7174760_q7dxr3.docx]

**
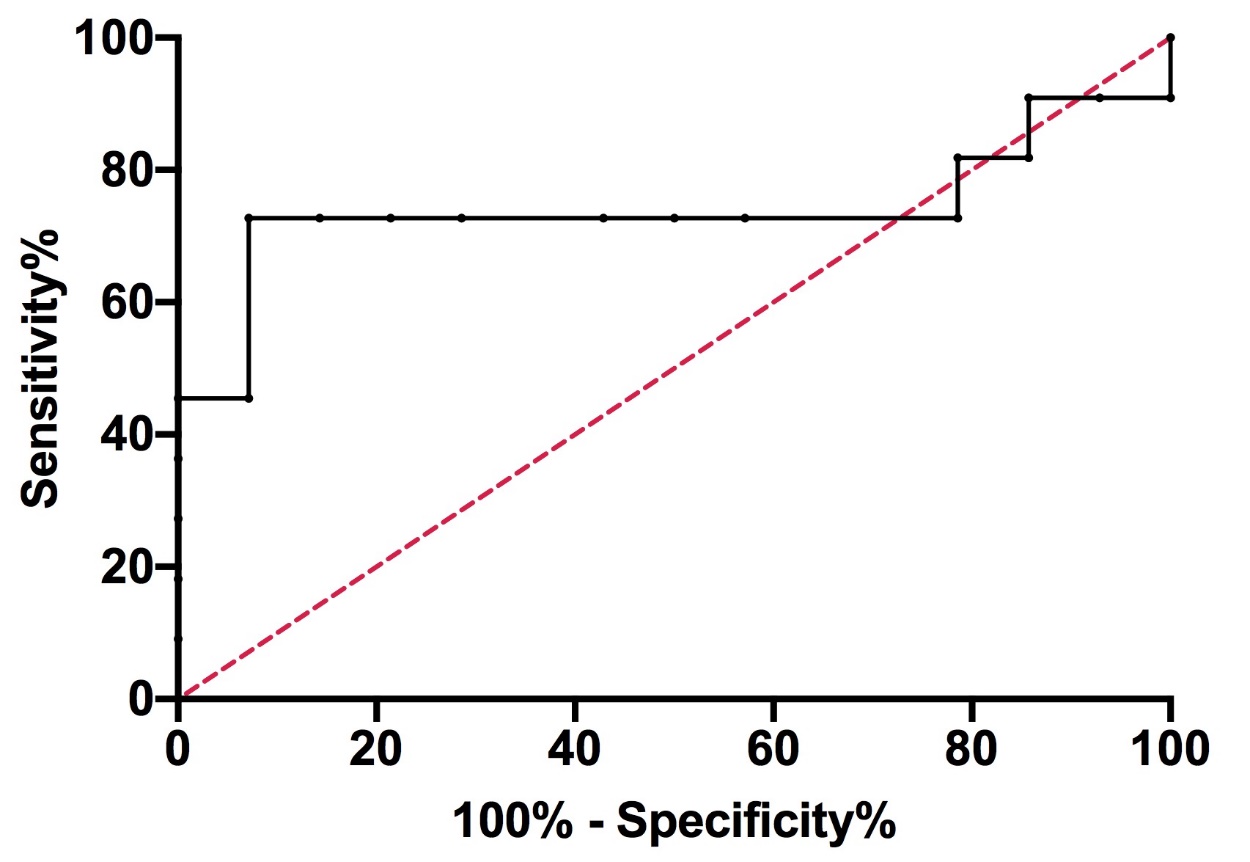
**

**Supplementary Figure S7. Receiver operating characteristic curve of vehicle-treated PDX mouse survival as predictor of response.** Compares the overall survival of vehicle-treated mice derived from patients who exhibited clinical response on study to those that did not experience a clinical response. Area under the ROC curve = 0.74, 95% CI 0.51-0.97, p =0.04.
